# Supplementary material for: Augmentation of Freshwater Productivity in a Single Slope Solar Still Using Ball Marbles
Source: Research Square preprint supplement (doi:10.21203/rs.3.rs-420418/v1), 2021-04-30
Supplement: Supplementary file 1 [file 791fdfccb8b349af50ccfd99.xlsx]

## Sheet: Sheet1
							Day 1															Day 1											Day 2
Time	Solar Radiation - Day 1	Solar Radiation - Day 2	Ambient Temperature - Day 1	Ambient Temperature - Day 2	Wind Speed Day 1	Wind Speed Day 1	Water - BMSS	Absorber - BMSS	Glass - BMSS	Ball Marbles - BMSS	Absorber - CSS	Water - CSS	Glass - CSS	Glass - BMSS	Water - BMSS	Absorber - BMSS	Ball Marbles - BMSS	Absorber - CSS	Water - CSS	Glass - CSS		Yield BM	Yield Conv	Yield Hourly B	Yield Hourly C	Yield B	Yield Conv	Yield Hourly B	Yield Hourly C	Efficiency	Efficiency		Yield BM	Yield Conv	Yield Hourly B	Yield Hourly C	Yield B	Yield Conv	Yield Hourly B	Yield Hourly C	Efficiency	Efficiency
08:00:00	152.35	221.61	27.8	30.1	2.3	2.6	32.3	34.1	30.8	31.2	32.5	32.6	29.4	29.4	30.2	32.1	30.4	30.8	30.4	29.6		0	0	0	0	0	0	0	0	0	0		0	0	0	0	0	0	0	0	0	0
08:30:00	387.81	477.84	28.9	30.4	3.6	4.1	41.1	43.9	37.1	38.9	42.6	37.3	35.9	33.6	36.6	38.4	39.3	33.6	32.4	32.4		0	0	0	0	0	0	0	0	0	0		0	0	0	0	0	0	0	0	0	0
09:00:00	491.69	637.12	29.8	30.6	4.5	5.1	43.1	46.8	41.1	43.3	44.5	41.5	40.5	38.6	43.6	45.8	43.6	35.6	34.8	34.4		10	0	10	0	16.6667	0	16.6667	0	4.33125	0		0	0	0	0	0	0	0	0	0	0
09:30:00	664.82	664.82	30.1	31.7	3.8	4.6	47.6	50.8	43.8	47.1	49.1	44.4	43.3	42.8	48.9	50.2	47.1	39.4	38.6	38.6		20	10	10	10	33.3333	16.6667	16.6667	16.6667	3.20332	3.20332		10	0	10	0	16.6667	0	16.6667	0	3.20332	0
10:00:00	734.07	727.15	31.4	32.3	4.9	2.6	51.2	53.2	46.2	51.2	52.4	48.9	46.2	46.3	50.3	54.8	49.4	42.5	39.4	42.2		40	20	20	10	66.6667	33.3333	33.3333	16.6667	5.80224	2.90112		40	20	30	20	66.6667	33.3333	50	33.3333	8.78624	5.8575
10:30:00	768.7	817.17	32.2	33.5	3.5	2.1	55.3	57.9	52.1	56.1	53.6	52.3	50.6	49.4	53.6	56.8	53.3	46.8	44.6	46.8		120	80	80	60	200	133.333	133.333	100	22.1635	16.6226		140	100	100	80	233.333	166.667	166.667	133.333	26.0609	20.8487
11:00:00	803.32	837.95	32.4	33.7	4.6	1.8	58.2	58.6	55.2	59.9	54.4	53.3	54.2	52.1	55.8	58.6	54.1	49.6	46.7	48.9		220	160	100	80	366.667	266.667	166.667	133.333	26.5102	21.2082		250	200	110	100	416.667	333.333	183.333	166.667	27.9562	25.4148
11:30:00	844.88	921.05	32.6	34.4	2.8	2.6	58.4	59.7	57.7	61.4	55.6	54.8	56.8	54.4	57.6	60.2	61.4	54.8	52.8	51.1		350	270	130	110	583.333	450	216.667	183.333	32.7684	27.7271		360	300	110	100	600	500	183.333	166.667	25.4339	23.1217
12:00:00	893.35	983.38	33.1	35.1	3.4	3.3	58.7	59.8	56.1	62.2	56.9	55.5	56.4	55.1	61.1	62.5	68.6	58.8	55.5	53.3		500	400	150	130	833.333	666.667	250	216.667	35.758	30.9902		490	420	130	120	816.667	700	216.667	200	28.1531	25.9875
12:30:00	941.83	1031.86	33.8	35.2	4.9	3.6	59.6	61.2	55.2	66.8	57.4	55.9	54.3	55.3	65.6	67.1	70.1	62.8	59.7	53.6		660	540	160	140	1100	900	266.667	233.333	36.1786	31.6563		640	550	150	130	1066.67	916.667	250	216.667	30.9582	26.8305
13:00:00	983.38	1052.63	33.8	34.6	3.5	2.5	60.8	62.4	54.6	69.1	57.8	56.8	55.1	55.8	68.9	69.9	73.5	66.4	62.3	54.1		800	660	140	120	1333.33	1100	233.333	200	30.3187	25.9875		810	690	170	140	1350	1150	283.333	233.333	34.3935	28.3241
13:30:00	817.17	976.45	34.8	34.4	4.5	4.3	63.1	64.2	55.5	67.6	58.1	56.6	55.3	54.2	71.1	72.5	71.1	67.1	62.6	54.2		910	760	110	100	1516.67	1266.67	183.333	166.667	28.667	26.0609		1010	870	200	180	1683.33	1450	333.333	300	43.6196	39.2577
14:00:00	685.6	921.05	35.1	33.2	4.1	4.3	60.1	62.1	55.6	66.4	57.4	55.8	54.1	53.8	69.2	70.1	70.2	65.2	60.8	52.1		1000	840	90	80	1666.67	1400	150	133.333	27.9562	24.85		1180	1040	170	170	1966.67	1733.33	283.333	283.333	39.3069	39.3069
14:30:00	637.12	844.88	33.4	33.1	2.3	4.6	58.5	60.6	53.9	64.8	53.6	52.8	51.1	51.1	66.2	69.2	69.2	61.1	59.8	52.1		1080	900	80	60	1800	1500	133.333	100	26.7407	20.0556		1330	1150	150	110	2216.67	1916.67	250	183.333	37.8097	27.7271
15:00:00	595.57	803.32	33.1	32.1	1.9	3.9	56.3	58.6	52.1	58.6	51.5	50.4	48.3	50.1	64.6	65.2	66.2	58.1	56.4	50.7		1160	970	80	70	1933.33	1616.67	133.333	116.667	28.6064	25.0306		1470	1250	140	100	2450	2083.33	233.333	166.667	37.1143	26.5102
15:30:00	367.04	664.82	32.4	31.8	1.6	4.1	52.8	55.2	49.9	55.8	48.6	45.9	43.5	48.6	58.1	60.1	63.3	54.6	51.1	47.7		1210	1010	50	40	2016.67	1683.33	83.3333	66.6667	29.0112	23.2089		1590	1350	120	100	2650	2250	200	166.667	38.4398	32.0332
16:00:00	263.16	311.63	32.3	31.8	2.3	3.2	51.6	53.9	47.9	53.1	45.6	44.1	41.1	45.4	54.2	55.3	58.4	53.8	49.9	43.3		1240	1040	30	30	2066.67	1733.33	50	50	24.2778	24.2778		1690	1440	100	90	2816.67	2400	166.667	150	68.3374	61.5037
16:30:00	235.46	228.53	31.6	30.8	2.9	3.8	50.6	52.9	46.6	49.9	42.3	40.8	39.8	41.1	51.1	54.4	51.8	47.6	45.8	41.1		1260	1050	20	10	2100	1750	33.3333	16.6667	18.0893	9.04466		1750	1460	60	20	2916.67	2433.33	100	33.3333	55.9125	18.6375
17:00:00	221.61	145.43	30.8	29.4	3.2	1.6	49.1	51.3	44.8	45.4	41.1	38.9	36.5	37.1	46.3	47.8	47.3	44.2	43.2	36.8		1280	1050	20	0	2133.33	1750	33.3333	0	19.2199	0		1760	1460	10	0	2933.33	2433.33	16.6667	0	14.6437	0
17:30:00	76.18	62.33	29.6	29.1	2.2	3.9	40.1	41.3	41.1	42.6	36.8	35.8	33.2	33.5	42.9	43.2	39.1	40.2	36.6	33.4		1290	1050	10	0	2150	1750	16.6667	0	27.9562	0		1770	1460	10	0	2950	2433.33	16.6667	0	34.1687	0
18:00:00	26.8	28.61	27.6	25.2	3.8	2.9	38.6	39.1	36.5	39.4	33.4	33.1	30.8	30.4	36.5	37.2	31.6	36.6	35.4	30.1		1290	1050	0	0	2150	1750	0	0	0	0		1770	1460	0	0	2950	2433.33	0	0	0	0
